# Supplementary material for: A unique polarity-sensitive photothermal sensitizer revealing down-regulated mitochondrial polarity during photo-induced cell death
Source: Royal Society of Chemistry journal article supplement (doi:10.1039/c9tb02233c), 2019-12-11
Supplement: c9tb02233c1.pdf [file c9tb02233c1.pdf]

Supporting information

**Unique Polarity-Sensitive Photothermal Sensitizer Revealing Down-regulated Mitochondrial Polarity During Photo-Induced Cell Death**

Chuang Liu, Minggang Tian, Weiyong Lin\*

Institute of Fluorescent Probes for Biological Imaging, School of Chemistry and Chemical Engineering, School of Materials Science and Engineering, University of Jinan, Jinan, Shandong 250022, P. R. China.

Email: [weiyonglin2013@163.com](mailto:weiyonglin2013@163.com)

# Contents

|                                                |    |
|------------------------------------------------|----|
| Materials .....                                | S3 |
| Spectroscopic measurements .....               | S3 |
| Cell culture.....                              | S3 |
| Figures and tables used in the manuscript..... | S4 |
| Figure S1.....                                 | S4 |
| Table S1.....                                  | S4 |
| Table S2.....                                  | S4 |
| Table S3.....                                  | S5 |
| Table S4.....                                  | S5 |
| Figure S2.....                                 | S5 |
| Figure S3.....                                 | S6 |
| Figure S4.....                                 | S6 |
| Figure S5.....                                 | S6 |
| Figure S6.....                                 | S7 |
| Figure S7.....                                 | S7 |
| Figure S8.....                                 | S8 |
| Figure S9.....                                 | S8 |

## **Materials**

All chemicals used are of analytical grade, 3-diethylaminophenol, 1,6-dihydroxynaphthalene, triphenylphosphine, 1,4-dibromobutane, etc. were purchased from Sinopharm Chemical Reagent Co., Ltd (Shanghai, China). Sphingomyelin, 1, 2-dipalmitoyl-sn-glycero-3-phospho-(1'-rac-glycerol), cholesterol, lecithin, and 1, 2-dioleoyl-sn-glycero-3-phospho-(1'-rac-glycerol) were purchased from Avanti Polar Lipids (Alabaster, AL, USA). The solvents used in the spectral measurement are of chromatographic grade.

## **Spectroscopic measurements**

The UV-visible-near-IR absorption spectra of dilute solutions were recorded on a U2910 spectrophotometer using a quartz cuvette having 1 cm path length. One-photon fluorescence spectra of dilute solutions were obtained on a HITACH F-2700 spectrofluorimeter equipped with a 450-W Xe lamp. PBS buffer solution: 10 mM, NaCl, NaHPO<sub>4</sub>·12H<sub>2</sub>O, NaH<sub>2</sub>PO<sub>4</sub>·2H<sub>2</sub>O, pH = 7.40.

## **Cell culture**

Hepg2 cells were grown in H-DMEM (Dulbecco's Modified Eagle's Medium, High Glucose) supplemented with 10% FBS (Fetal Bovine Serum) in a 5% CO<sub>2</sub> incubator at 37 °C. For cell imaging experiments, live Hepg2 cells were suspended and diluted in the culture medium with cell concentration of 10000 cells/mL. 1 mL of the cell suspension solution was added into glass bottom dish and cultured for 24 h to allow adhesion.

## Figures and tables used in the manuscript

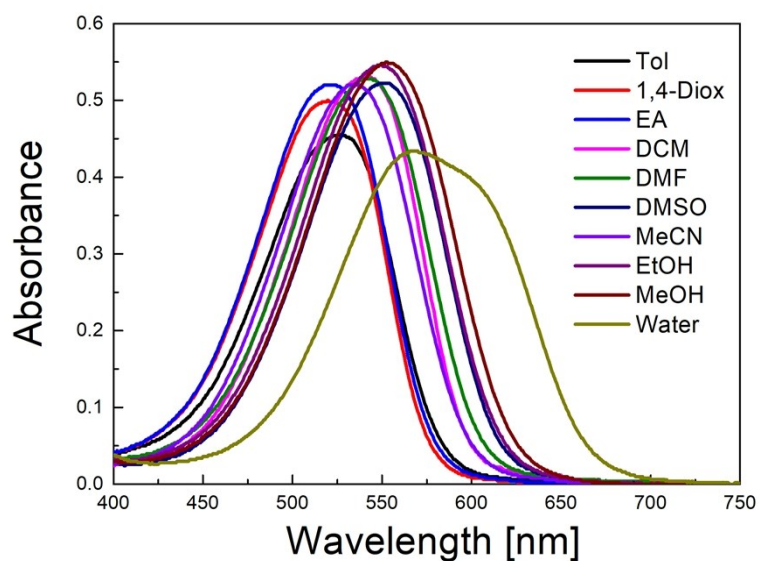

**Figure S1.** The absorption spectra of NRTP (10  $\mu$ M) in various solvents.

**Table S1.** The volume of stock solutions used to prepare GUVs

| GUVs       | $V_{[SM]}$ [ $\mu$ L] | $V_{[DPPG]}$ [ $\mu$ L] | $V_{[CL]}$ [ $\mu$ L] | $V_{[LE]}$ [ $\mu$ L] | $V_{[DOPG]}$ [ $\mu$ L] |
|------------|-----------------------|-------------------------|-----------------------|-----------------------|-------------------------|
| SM         | 50                    | 50                      | 10                    | 0                     | 0                       |
| LE         | 0                     | 0                       | 0                     | 50                    | 50                      |
| LE + 10%CL | 0                     | 0                       | 5                     | 50                    | 50                      |
| LE + 40%CL | 0                     | 0                       | 20                    | 50                    | 50                      |

**Table S2.** The emission wavelength and quantum yield of NRTP in various solvents.

| Solvent     | Polarity | Emission [nm] | Quantum Yield |
|-------------|----------|---------------|---------------|
| Toluene     | 33.9     | 605           | 0.242         |
| 1,4-Dioxane | 36.0     | 608           | 0.256         |
| EA          | 38.1     | 610           | 0.236         |
| DCM         | 40.7     | 620           | 0.188         |
| DMF         | 43.2     | 651           | 0.141         |
| DMSO        | 45.1     | 647           | 0.096         |
| MeCN        | 45.6     | 631           | 0.193         |
| EtOH        | 51.9     | 634           | 0.064         |
| MeOH        | 55.4     | 645           | 0.069         |
| Water       | 63.1     | 672           | 0.002         |

**Table S3.** The emission wavelength and quantum yield of NRTP in mixed solvents of water and 1,4-dioxane.

| Water fraction | Emission [nm] | Quantum Yield |
|----------------|---------------|---------------|
| 0%             | 608           | 0.256         |
| 1%             | 616           | 0.243         |
| 2%             | 620           | 0.212         |
| 4%             | 628           | 0.187         |
| 6%             | 632           | 0.159         |
| 8%             | 637           | 0.135         |
| 10%            | 639           | 0.125         |
| 15%            | 644           | 0.116         |
| 20%            | 646           | 0.091         |
| 25%            | 649           | 0.071         |
| 30%            | 651           | 0.052         |
| 35%            | 653           | 0.050         |
| 40%            | 655           | 0.037         |
| 60%            | 663           | 0.019         |
| 80%            | 669           | 0.007         |
| 100%           | 672           | 0.002         |

**Table S4.** The temperature of 5 mM NRTP in mixed solvent of DMSO and PBS buffer (v:v = 1:4) after irradiation by mercury lamp (200-800 nm) for different time.

| Irradiation time [min] | Temperature (°C) |
|------------------------|------------------|
| 0                      | 20               |
| 5                      | 40               |
| 10                     | 45               |
| 15                     | 48               |

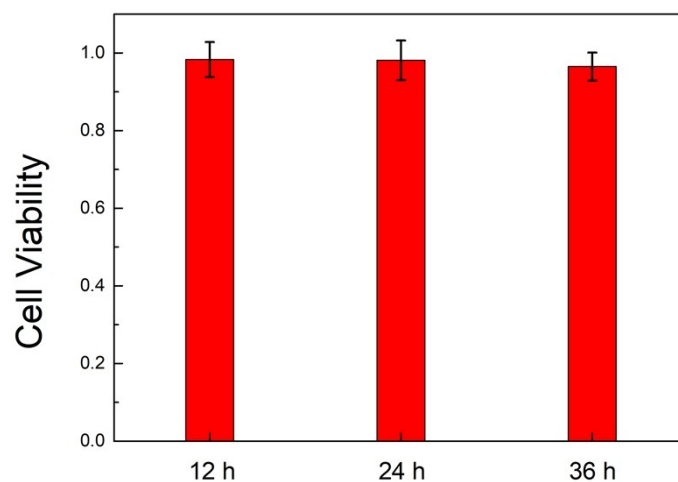

**Figure S2.** The cell viability of HepG2 cells incubated by 5  $\mu$ M NRTP for different time.

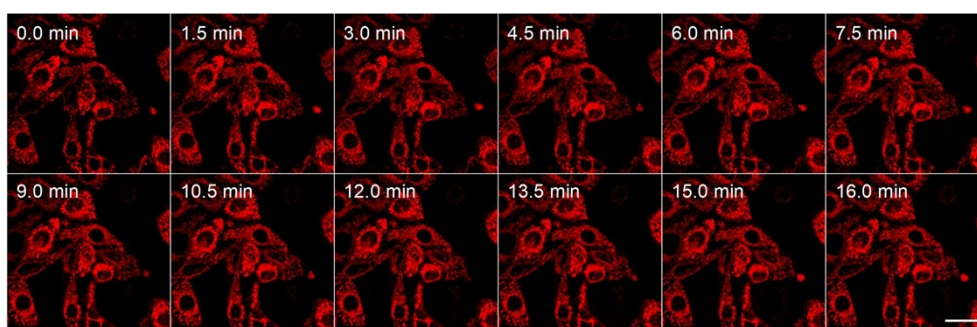

**Figure S3.** The fluorescence images of HepG2 cells incubated by 5  $\mu$ M NRTP under the ceaseless exposure to 561 nm laser for different time (0-16 min).

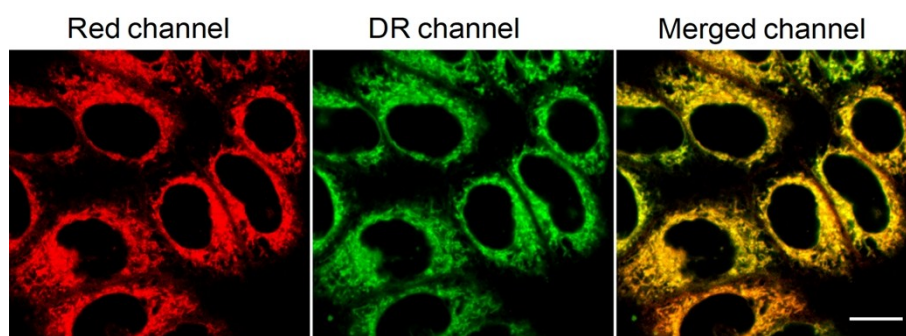

**Figure S4.** The fluorescent images of HepG2 cells co-stained by 5  $\mu$ M NRTP and 200 nM MTDR for 30 min, exposed by high-power 561 nm laser for 5 min, and then imaged under the excitation by low-power 561 nm laser (red channel, NRTP) and 647 nm laser (DR channel, MTDR). Bar = 20  $\mu$ m.

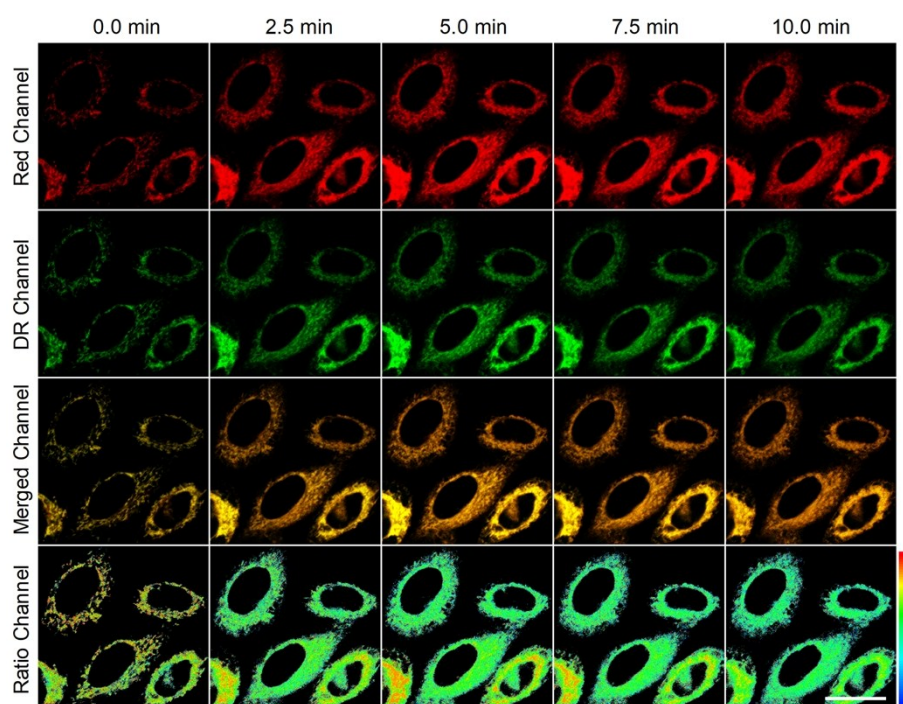

**Figure S5.** The fluorescent and ratiometric images of HepG2 cells incubated by 5  $\mu$ M NRTP then exposure to high-power 561 nm laser for different time (1-10 min).  $\lambda_{ex}$  = 561 nm. Bar = 20  $\mu$ m.

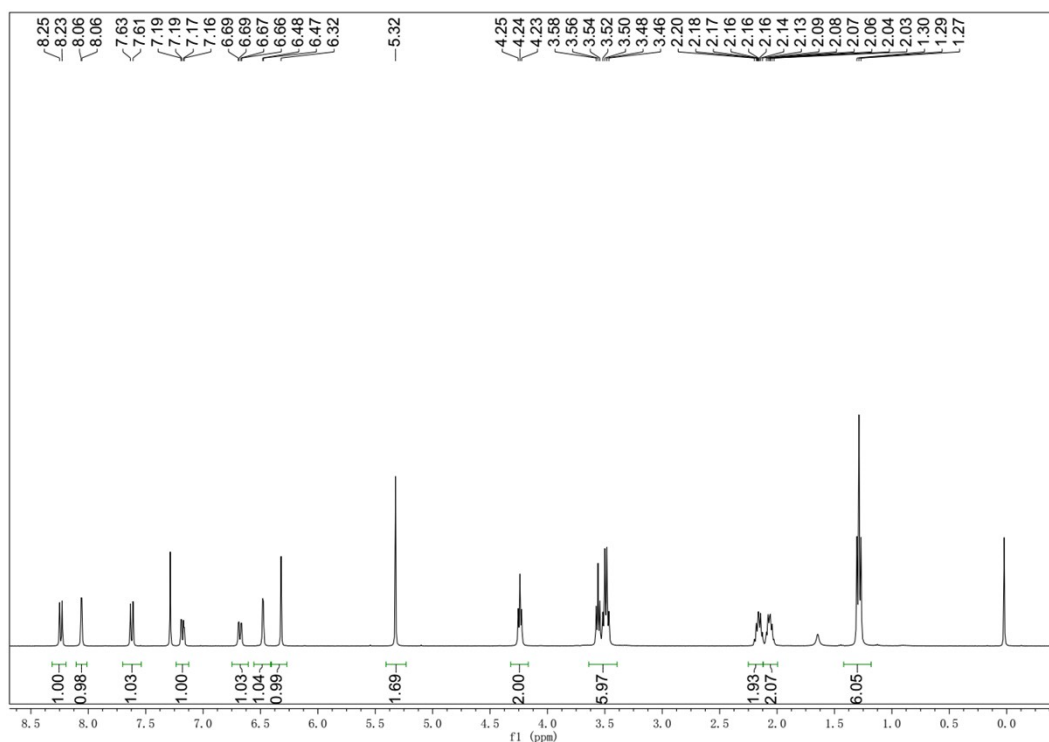

Figure S6. The  $^1\text{H}$  NMR spectra of **2**.

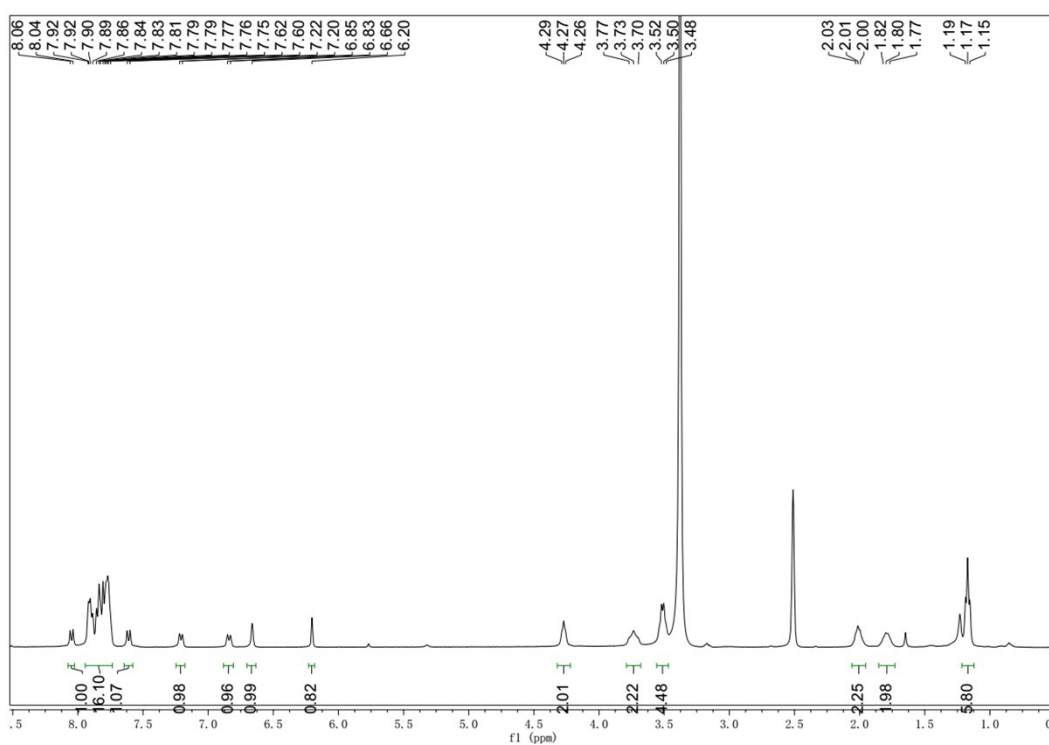

Figure S7. The  $^1\text{H}$  NMR spectra of NRTP.

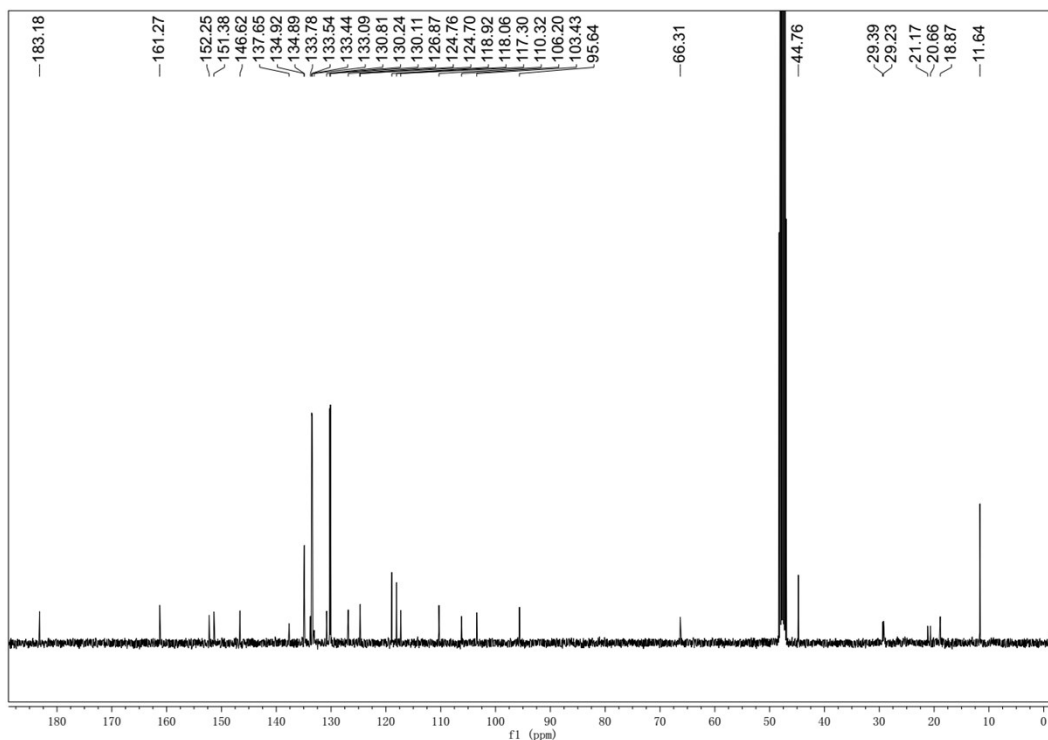

**Figure S8.** The <sup>13</sup>C NMR spectra of NRTP.

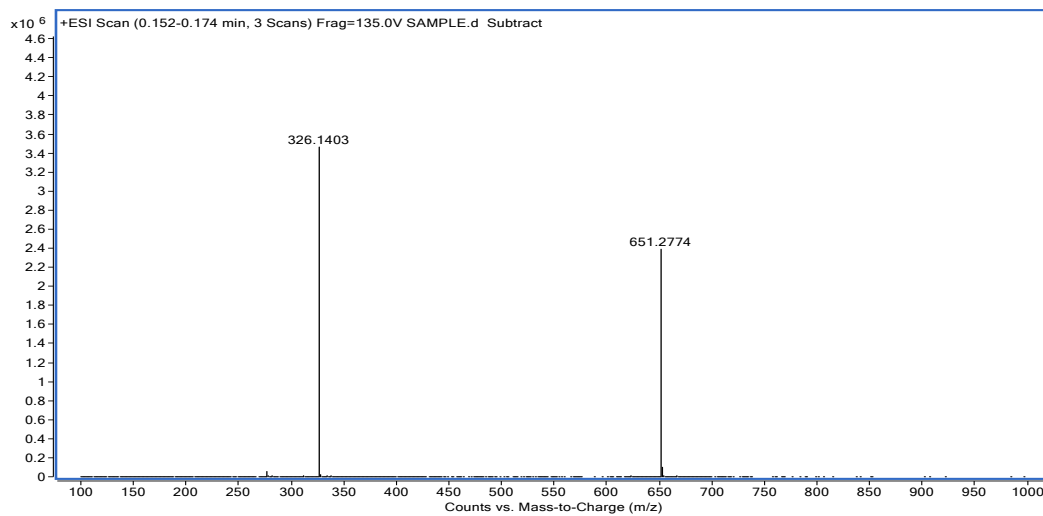

**Figure S9.** The HRMS spectra of NRTP.
